# 1 **Cheating the cheater: Suppressing false positive enrichment** 2 **during biosensor-guided biocatalyst engineering**

3 Vikas D. Trivedi, Karishma Mohan, Todd C. Chappell, Zachary J. S. Mays, Nikhil U. Nair\*

4 Department of Chemical and Biological Engineering, Tufts University, Medford, MA 02155

5 \*Corresponding author, [nikhil.nair@tufts.edu](mailto:nikhil.nair@tufts.edu), @nair\_lab

6  
7 **KEYWORDS:** Gene circuits, protein engineering, directed evolution, phenylalanine  
8 ammonia-lyase, PAL, Phenylketonuria, PKU

## 9 10 **ABSTRACT.**

11 Transcription factor (TF)-based biosensors are very desirable reagents for high-throughput  
12 enzyme and strain engineering campaigns. Despite their potential, they are often difficult to  
13 deploy effectively as the small molecules being detected can leak out of high-producer cells,  
14 into low-producer cells, and activate the biosensor therein. This crosstalk leads to the  
15 overrepresentation of false positive/cheater cells in the enriched population. While the host cell  
16 can be engineered to minimize crosstalk (e.g., by deleting responsible transporters), this is not  
17 easily applicable to all molecules of interest, particularly those that can diffuse passively. One  
18 such biosensor recently reported for *trans*-cinnamic acid (tCA) suffers from crosstalk when  
19 used for phenylalanine ammonia-lyase (PAL) enzyme engineering by directed evolution. We  
20 report that desensitizing the biosensor (i.e., *increasing* the limit of detection, LOD) suppresses  
21 cheater population enrichment. Further we show that, if we couple the biosensor-based screen  
22 with an orthogonal pre-screen that eliminates a large fraction of true negatives, we can  
23 successfully reduce the cheater population during the fluorescence-activated cell sorting  
24 (FACS). Using the approach developed here, we were successfully able to isolate PAL variants  
25 with ~70% high  $k_{cat}$  after a single sort. These mutants have tremendous potential in  
26 Phenylketonuria (PKU) treatment and flavonoid production.

27

## 28 INTRODUCTION.

29 While experimental and computational pathway along with biocatalyst designs have made  
30 major strides in past decades, screening for high target metabolite producing cells and enzymes  
31 remains a major bottleneck<sup>1</sup>. As with protein directed evolution, one of the bottlenecks in  
32 combinatorial metabolic engineering is the screening step<sup>2</sup>. Techniques like high-performance  
33 liquid chromatography (HPLC) that are traditionally used monitor concentrations of products  
34 or metabolic intermediates during strain development are too low throughput to screen large  
35 combinatorial libraries<sup>3</sup>. Resultantly, significant effort has been expended to develop higher  
36 throughput screening methods to monitor metabolite levels<sup>4-6</sup>. Most popular among these are  
37 genetically-encoded biosensors<sup>7-9</sup>, which link a phenotype to a readily detectable quantitative  
38 output signal. Biosensors are most frequently transcription factor- (TF) or riboswitch-based<sup>10-</sup>  
39 <sup>12</sup> – although other modalities like enzyme-based<sup>13-15</sup> or protein-protein interaction-based<sup>16</sup> are  
40 also possible. Among these, TF-based biosensors are most widely used due to ease of  
41 construction and tunability. These TFs specifically bind a target metabolite (e.g., pathway  
42 intermediate, substrate, or final product) and activate or repress expression of a reporter gene  
43 – usually a fluorescent protein, which can then be screened using fluorescence-activated cell  
44 sorting (FACS). Many of the biosensors described in the literature are based on natural  
45 transcription factors. However, genetic circuits controlling them often need to be engineered  
46 to reduce high basal expression, improve dynamic range, increase sensitivity, and ensure  
47 orthogonality<sup>17</sup>. Examples for the application of these TF-based sensor-selector systems  
48 include screening campaigns for identifying improved producers of malonyl-CoA<sup>18, 19</sup>,  
49 naringenin<sup>20, 21</sup>, *cis,cis*-muconic acid<sup>22, 23</sup>, glucaric acid<sup>24</sup>, and fatty acyl-CoA<sup>25</sup>, vanillin<sup>26</sup>,  
50 protocatechuate<sup>27</sup>, butanol<sup>28</sup>, lactam<sup>5</sup>, etc.

51

52 A major shortcoming of many biosensor-based systems is the propensity of “cheater” cells or  
53 false positives to enrich<sup>1, 29-31</sup>. This is particularly concerning when the metabolite being sensed  
54 can be actively or passively transported in and out of cells. Recent examples include use of a  
55 biosensor-based engineering to identify overproducers of *trans*-cinnamic acid (tCA)<sup>32</sup>, benzoic  
56 acid and derivatives<sup>33</sup>, 1-butanol<sup>34</sup>, and naringenin<sup>2</sup>, or to improve synthetic methylotrophy with  
57 formaldehyde-responsive TFs<sup>35, 36</sup>. All these studies had to contend with a false positive when  
58 using the biosensor for strain or protein engineering. Flachbart et al.<sup>32</sup> recognized the high false  
59 rate and attempted to mitigate it by maintaining the cells at low cell densities to reduce  
60 extracellular tCA concentrations and transport. However, their directed evolution campaign to

61 identify improved variants of enzyme phenylalanine ammonia-lyase (PAL) was still severely  
62 hindered by presence of false positive cells (“cheaters”) in the FACS-enriched population,  
63 resulting in variants with only modest improvement ( $\leq 11\%$ ) in  $k_{cat}$  even after five rounds of  
64 stringent sorting. In this work, we describe conditions that help mitigate enrichment of cheaters  
65 during high-throughput screening campaigns using the tCA biosensor system. We first  
66 demonstrate that decreasing sensitivity (i.e., increasing the limit of detection, LOD) of the  
67 biosensor circuit output significantly reduces false positives. Next, we show that incorporation  
68 of a pre-screen can further mitigate cheater enrichment. With the modified workflow, we  
69 undertook a directed evolution campaign to improve PAL (from *Anabaena variabilis*<sup>37</sup>)  
70 activity on its native substrate, phenylalanine (Phe), and were able to identify variants with ~70  
71 % higher activity ( $k_{cat}$ ) after a single round of sorting – the highest reported for a PAL by  
72 biosensor-guided engineering.

73

## 74 **RESULTS AND DISCUSSION.**

### 75 **Abundance of cheater cells and true positives are highly correlated.**

76 The *E. coli* HcaR transcription factor (TF), which induces the expression of the  
77 hydroxycinnamic acid (*hca*) catabolic operon, forms the basis of our biosensor design, and is  
78 similar to the previous design<sup>32</sup> (**Figure 1A**). We placed *sfGFP* under the control of an HcaR-  
79 responsive promoter ( $P_{hcaE}$ ) in a plasmid (pVDT46) and transformed in *E. coli* MG1655 *rph*<sup>+</sup>  
80 to create a strain hereon referred to as Ecvdt46. However, unlike in the published design, we  
81 did not knockout the native *hcaREFCABD* operon in *E. coli*, enabling catabolism of tCA<sup>38</sup>. To  
82 assess the evolution of cheater cells by tCA cross-feeding, we investigated how they evolve as  
83 a function of true positive population. We call true positives biosensor-encoding cells that  
84 generate tCA through PAL-mediated deamination of phenylalanine (Phe) (i.e., PAL<sup>+</sup>) (**Figure**  
85 **1B**) and true negatives as those without functional PAL (i.e., PAL<sup>-</sup>). We integrated a blue  
86 fluorescent protein (BFP) reporter in PAL<sup>-</sup> cells to aid in tracking their population (**Figure**  
87 **1C**). Thus, PAL<sup>-</sup> cells are unable to generate intracellular tCA (true negatives, **Figure 1C**) and  
88 would only activate their biosensor if they import exogenous tCA (false positives, **Figure 1D**).  
89 Next, we generated a mock library by mixing PAL<sup>-</sup> and PAL<sup>+</sup> cells in different ratios and  
90 monitored the evolution of cheater cells during co-culture. We observed that the abundance of  
91 cheater cells was positively and monotonically PAL<sup>+</sup> dose-dependent (**Figure 1E–G**). These  
92 cells show up in the GFP<sup>+</sup> and BFP<sup>+</sup> channels (top right) whereas true positives are GFP<sup>+</sup> only  
93 and are simply upshifted (top left). This validates our hypothesis that false positives are

94 generated only in the presence of PAL<sup>+</sup> (tCA-producing) cells through import of tCA in PAL<sup>-</sup>  
 95 cells. Thus, the system as is, unsuitable for biocatalyst engineering campaign.

96

97

98

99

100

101

102

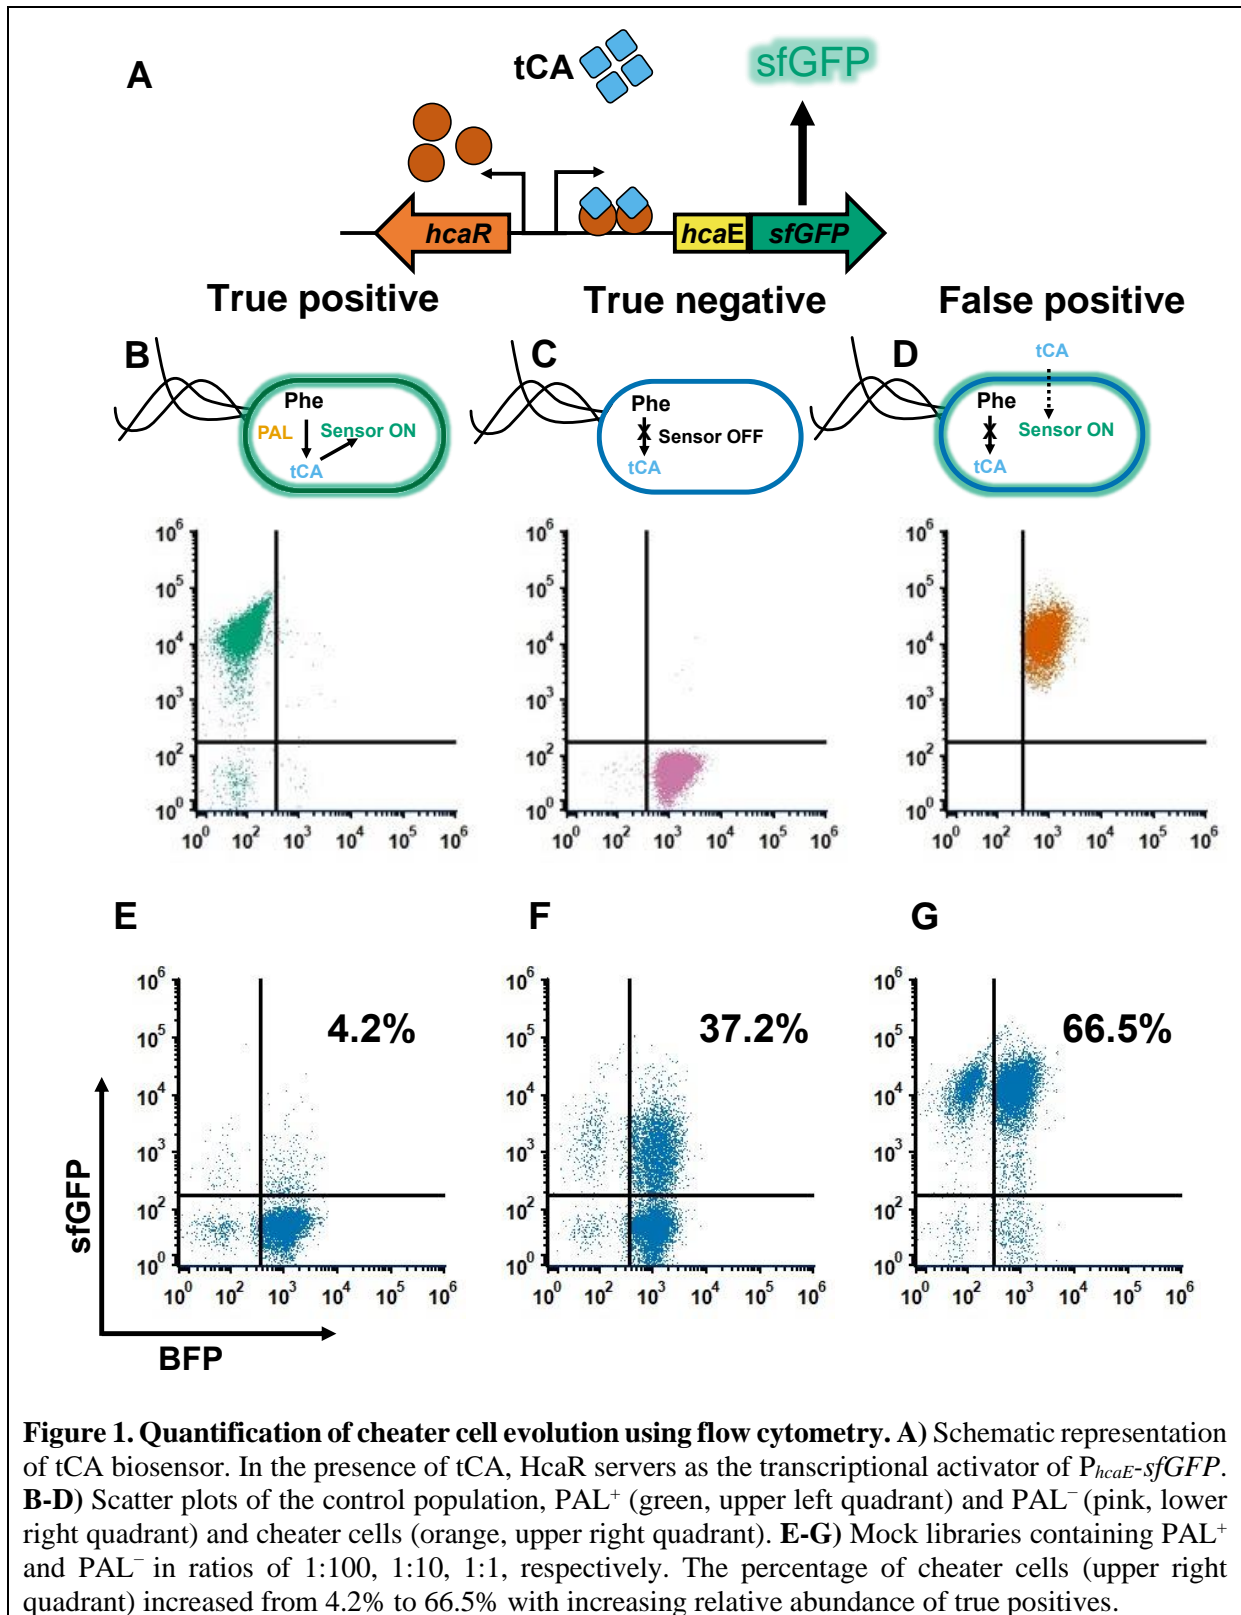

103

104

105

106

107

108

109

110 Various approaches have been used to fine-tune the biosensor response, increase their dynamic  
 111 range, sensitivity, and prevent crosstalk<sup>17</sup>. But these approaches are generally designed and  
 112 tested on a clonal population, often with exogenously added metabolite, which may not always  
 113 translate when applied to a high-throughput screen of a heterogenous population like a  
 114 biocatalyst library with intracellularly produced metabolite. One approach that seems  
 115 promising is to alter the expression of the TF<sup>39</sup> (HcaR, here) or titrating the operator binding  
 116 sites on promoter driving expression of the reporter protein<sup>40, 41</sup> (in this case, *P<sub>hcaE</sub>*). However,  
 117

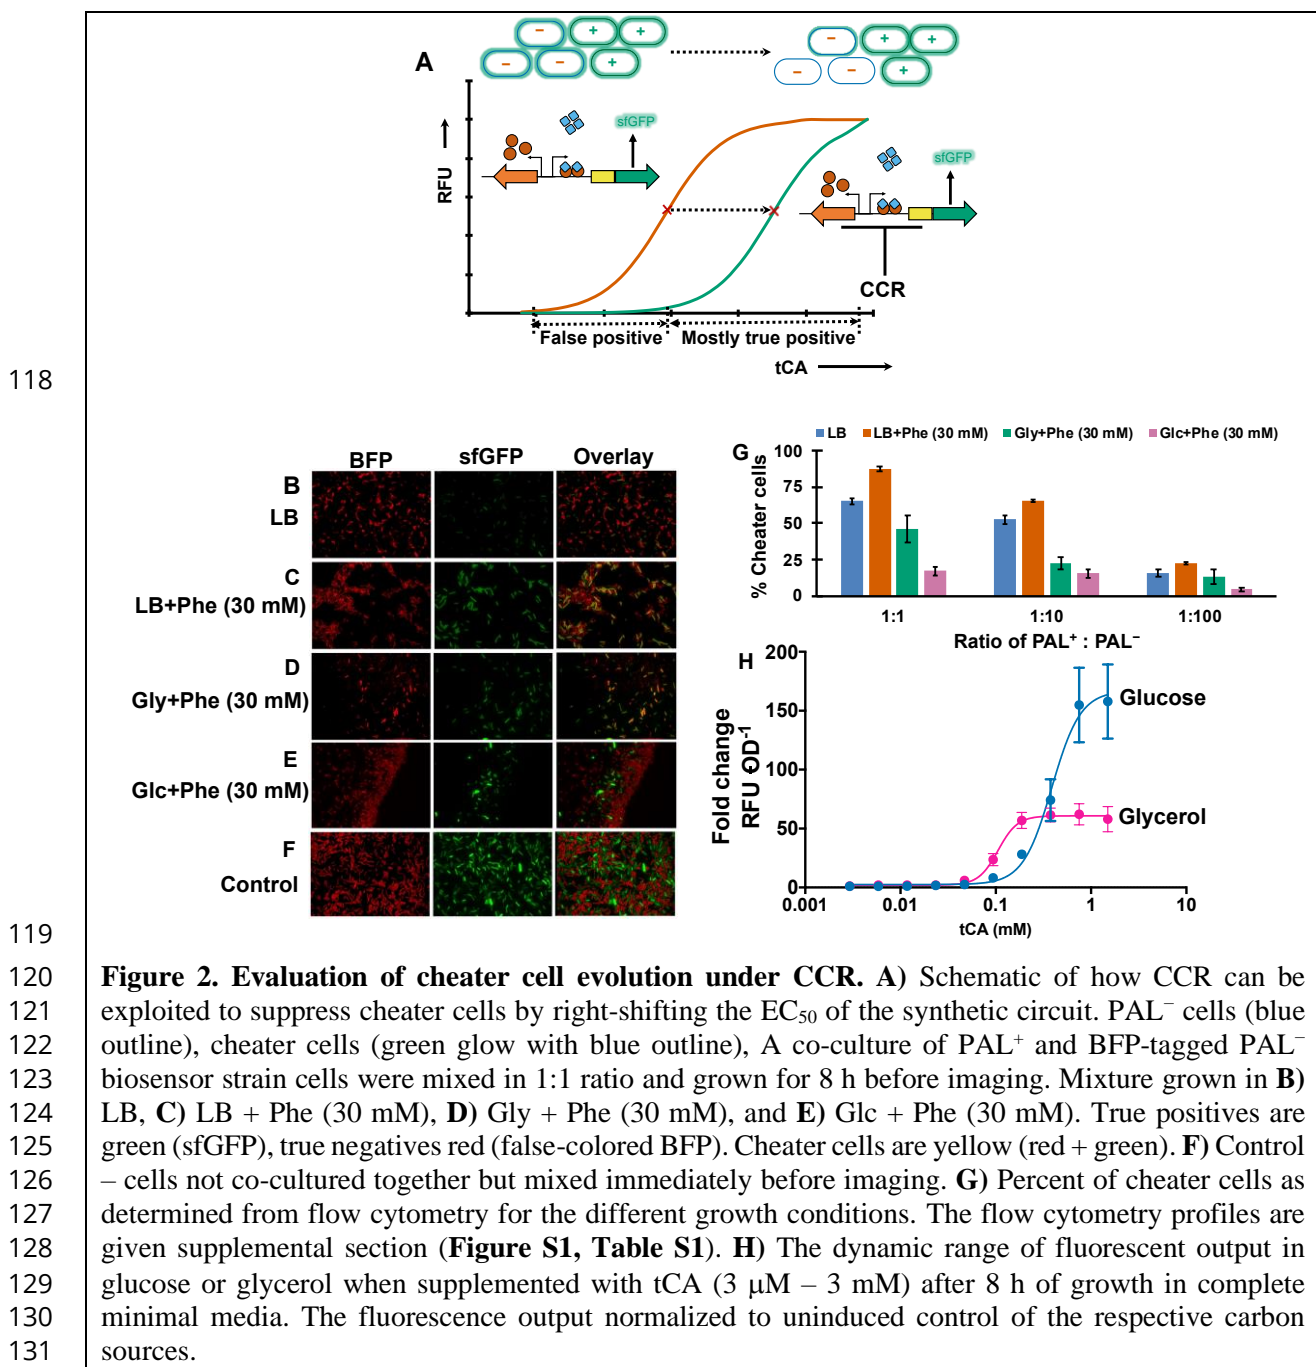

132 this can be laborious and/or time-consuming. So, we sought an alternate approach for the same  
133 outcomes by leveraging the native *E. coli* regulatory mechanism, given that the biosensor-  
134 promoter pair is native to this bacterium.

135

136 **Carbon catabolite repression (CCR) alters the sensor response to suppress cheater cell**  
137 **evolution.**

138 HcaR is an activator of *hca* operon<sup>38</sup>, which encodes genes required to catabolize phenolic  
139 acids like tCA. But as non-preferred substrates, the expression of the *hca* operon (and HcaR)  
140 is subject to carbon catabolite repression (CCR) by glucose<sup>42</sup>. We hypothesized that this CCR  
141 could be leveraged to desensitize the biosensor to low intracellular tCA concentrations present  
142 in cheater cells that import exogenous tCA (**Figure 2A**). This creates a threshold for activation  
143 that may only be surpassed at high intracellular tCA levels, as expected of cells with active  
144 PAL. To test this, we re-created a mock a library of PAL<sup>+</sup> and BFP-tagged PAL<sup>-</sup> biosensor  
145 cells, as before, and looked for the appearance of cheater cells under different growth  
146 conditions – in LB, LB + Phe, glycerol (Gly) + Phe, or glucose (Glc) + Phe. We observed, as  
147 expected, that in non-repressing media (LB, LB + Phe, Gly + Phe) the percent of cheater cells  
148 was high (**Figure 2B–D**), and *vice versa* in Glc + Phe condition (**Figure 2E**). This supports  
149 our hypothesis that native regulatory structure can be leveraged to suppress cheater evolution.  
150 To further support our conclusion that Glc-mediate CCR desensitizes the biosensor, enabling  
151 activation only at higher intracellular concentrations, we assessed the response of the biosensor  
152 to exogenously added tCA in both, Glc and Gly, media (**Figure 2G**). Although the fluorescence  
153 response for both Gly and Glc containing media was similar (**Figure S2A**), Glc condition  
154 exhibited higher fold change in fluorescence (150-fold) and larger dynamic range (100 – 750  
155  $\mu$ M, **Figure 2H**). We also observed activation of the tCA sensor in media containing Gly even  
156 when not challenged with tCA (**Figure S2B**). Whereas we observed drop in fluorescence in  
157 Glc containing media (**Figure S2B**). The EC<sub>50</sub> observed for Glc (386  $\mu$ M) condition is higher  
158 than that for Gly (105  $\mu$ M), indicating decreased sensitivity. This decreased sensitivity appears  
159 to be beneficial as it suppresses fluorescence activation in cheater cells that are expected to  
160 have a lower intracellular concentration of tCA.

161

162

163

164 **An orthogonal growth-coupled pre-screen further suppresses cheater evolution.**

165 Previously, we developed and optimized an enrichment for active PAL variants by linking  
166 evolution of ammonium ( $\text{NH}_4^+$ ) to cell growth during deamination of Phe to tCA<sup>37</sup>. We also  
167 recently showed that this screen readily and rapidly eliminates inactive PAL variants from a  
168 mutagenized library<sup>43</sup>. Hence, we posited that using this orthogonal pre-screen based on growth  
169 can further mitigate cheater cell enrichment during FACS (**Figure 3**). For this, we created a  
170 mock library containing PAL<sup>+</sup> and BFP-tagged PAL<sup>-</sup>, as before (in 1:1 and 1:10 ratios,  
171 respectively). This pre-defined library was subjected to growth-coupled enrichment for three  
172 passages in selective minimal medium with Phe as the sole nitrogen source (**Figure 3A**). At  
173 the end of every passage, the samples were analyzed on flow cytometry to detect the presence  
174 of cheater cells (**Figure 3B–E**). We observed a drop in the percent of cheater cells in the  
175 population and at the end of passage #3 to <1 % (**Figure 3F**). This indicates that pre-screening  
176 of library using growth-coupled enrichment can largely eliminate the PAL<sup>-</sup> population and  
177 reduce the number of cheater cell events during FACS (**Figure 3G**).

178

179

180

181

182

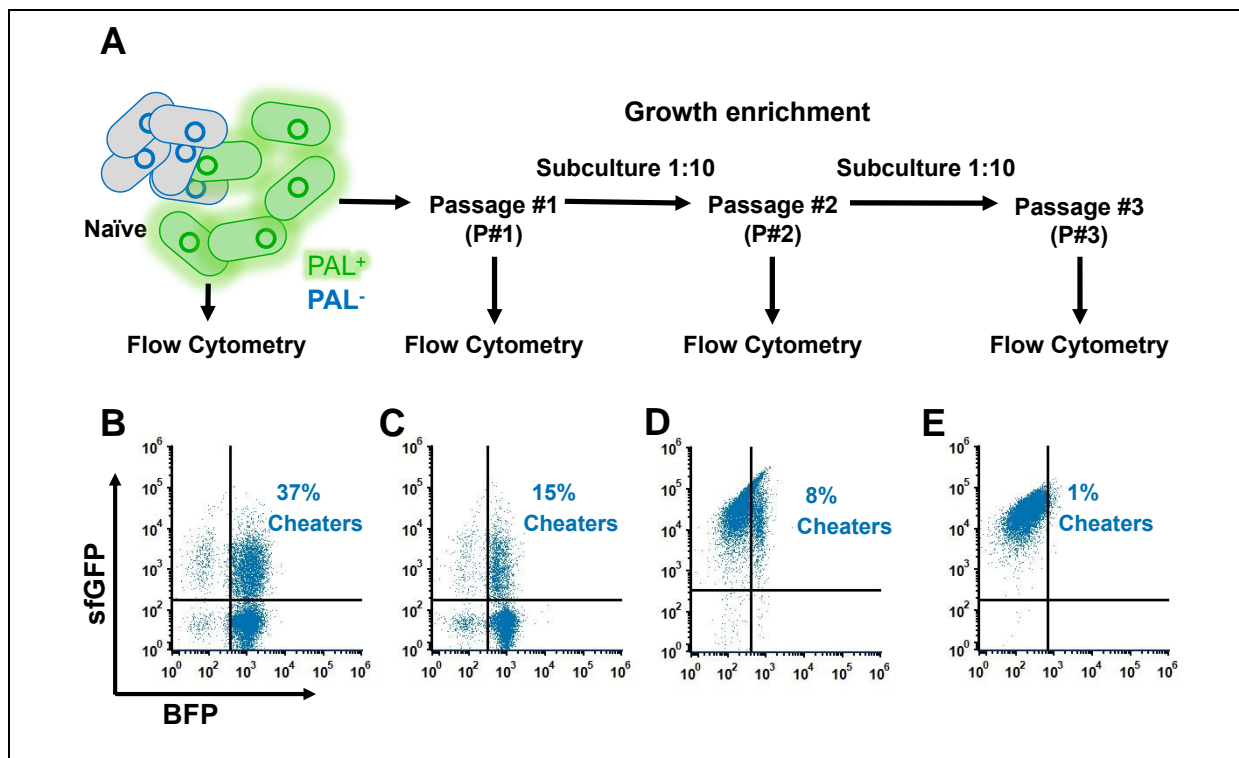

183

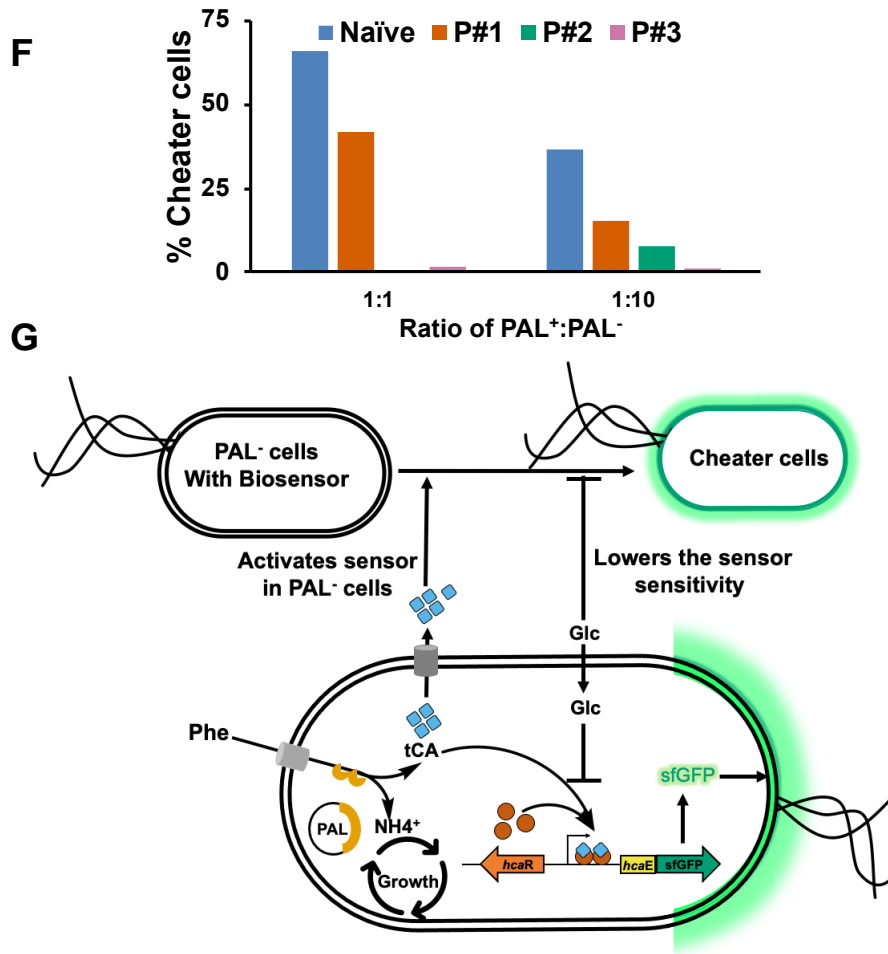

184

185 **Figure 3. Growth-coupled enrichment mitigates cheater evolution.** A) Overview of method used to  
 186 demonstrate that growth-coupled pre-screen eliminates cheater cells. PAL<sup>+</sup> and BFP-tagged PAL<sup>-</sup> cells  
 187 were mixed in 1:1 or 1:10 ratio and subjected to selection for three passages in selective media. Presence  
 188 of cheater cells were shown for 1:10 mock library using flow cytometry for B) Naïve, C) passage #1  
 189 (P#1), D) passage #2 (P#2), and E) passage #3 (P#3, gating was adjusted for P#2 and #3 to account for  
 190 increased sfGFP fluorescence which could not be corrected by compensation). See supplemental **Figure**  
 191 **S3** for scatter plots of the 1:1 mock library. F) Percent of cheater cells after different passages relative  
 192 to naïve for 1:1 and 1:10 mixtures. G) Proposed design to suppress activation of the biosensor in cheater  
 193 cells through carbon catabolite repression and growth-coupled pre-screen. In presence of active PAL,  
 194 intracellular phenylalanine (Phe) is deaminated to ammonium (NH<sub>4</sub><sup>+</sup>) and *trans*-cinnamic acid (tCA).  
 195 tCA binds to HcaR to activate the transcription of *P<sub>hcaE</sub>-sfGFP*. Since tCA can be transported in and out  
 196 of cells, it can enter PAL<sup>-</sup> cells (that inherently do not produce any tCA) and activate expression of  
 197 sfGFP. These PAL<sup>-</sup> cells show up as “cheater” cells during FACS and flow cytometry. While glycerol  
 198 (Gly) and glucose (Glc) can serve as substrates for growth, only Glc engages CCR of the *hca* operon,  
 199 decreasing basal activation. CCR also lowers the sensitivity of the biosensor, which is beneficial in  
 200 preventing activation of the sensor by low intracellular tCA concentrations that may be present in PAL<sup>-</sup>  
 201 cells. Utilization of NH<sub>4</sub><sup>+</sup> for growth produced by PAL can further enrich true positives over false  
 202 positives in mixed populations.

203

204 **The biosensor response is a predictor of enzyme activity.**

205 Using the two-step approach, we screened a previously created ~10<sup>5</sup> member error-prone PCR  
 206 library of PAL<sup>37</sup>. After pre-screening with three rounds of growth enrichment, we transformed



207 the plasmids into the biosensor strain, Ecvdt46. We noted that >80 % of the passage #3  
208 population had higher fluorescence than parental PAL (**Figure 4A**), further validating the  
209 utility of the pre-screen. We sorted the library based on fluorescence and collected 80 events  
210 from top 5 % of the population in a microtiter plate and then screened for tCA production and  
211 fluorescence in a spectrophotometer (**Figure 4B–C**). Of these, 11 variants did not revive. The  
212 surviving variants showed good correlation (Pearson correlation coefficient,  $r_P = 0.73$ ) between  
213 total cellular PAL activity and biosensor output (**Figure 4D**). Of these, we picked the top 14  
214 tCA producers for further characterization and purified them (along with parental PAL) and  
215 determined their specific activity in the presence of 30 mM Phe. We observed that biosensor  
216 response showed better correlation with PAL specific activity than did growth rate in minimal,  
217 ammonium-depleted, Phe medium (**Figure 4E–F**). This suggest that biosensor-based screen is  
218 a better to isolate high activity PAL variants compared to the growth-based pre-screen. These  
219 results also highlighting the benefit of the dual approach for directed evolution of PAL where  
220 the growth-based pre-screen eliminates inactive variants while the biosensor screen stratifies  
221 the remaining library by activity. On sequencing these 14 variants we found 20 unique mutated  
222 positions (**Table S2**).

223

#### 224 **Further PAL engineering identifies mutants with improved activity.**

225 Using these 20 unique positions we created a new library of  $\sim 10^7$  members to identify higher  
226 activity variants. To achieve this, we generated a new library by combining 3 or 4  
227 mutations/protein ( ${}^{20}C_{3-4}$ , 20 choose up to 3 or 4). This strategy was chosen for diversification  
228 to ensure that the library size was small enough to be thoroughly screened while also ensuring  
229 comprehensive coverage of all 20 positions and 20 amino acids. In this combinatorial approach,  
230 we first performed individual site saturation mutagenesis (SSM) at all the twenty positions as  
231 separate reactions. Following assembly into circular plasmids and pooling in equimolar  
232 amounts, they served as template for second round of individual amplifications using the same  
233 SSM primers. Since some of the positions were close together (*viz.* G218, M222), a single SSM  
234 primer was generated to span the spatially close sites. Hence, at this stage each variant  
235 contained mutations at two to three out of the twenty positions ( ${}^{20}C_{2-3}$ ). This step was repeated  
236 once more to obtain three to four mutations out of the twenty positions ( ${}^{20}C_{3-4}$ ). This naïve pool  
237 was pre-screened and then transformed into the biosensor strain for FACS (**Figure 5A**).  
238 Passage #3 of the pre-screen showed higher median sfGFP fluorescence compared to the  
239

240

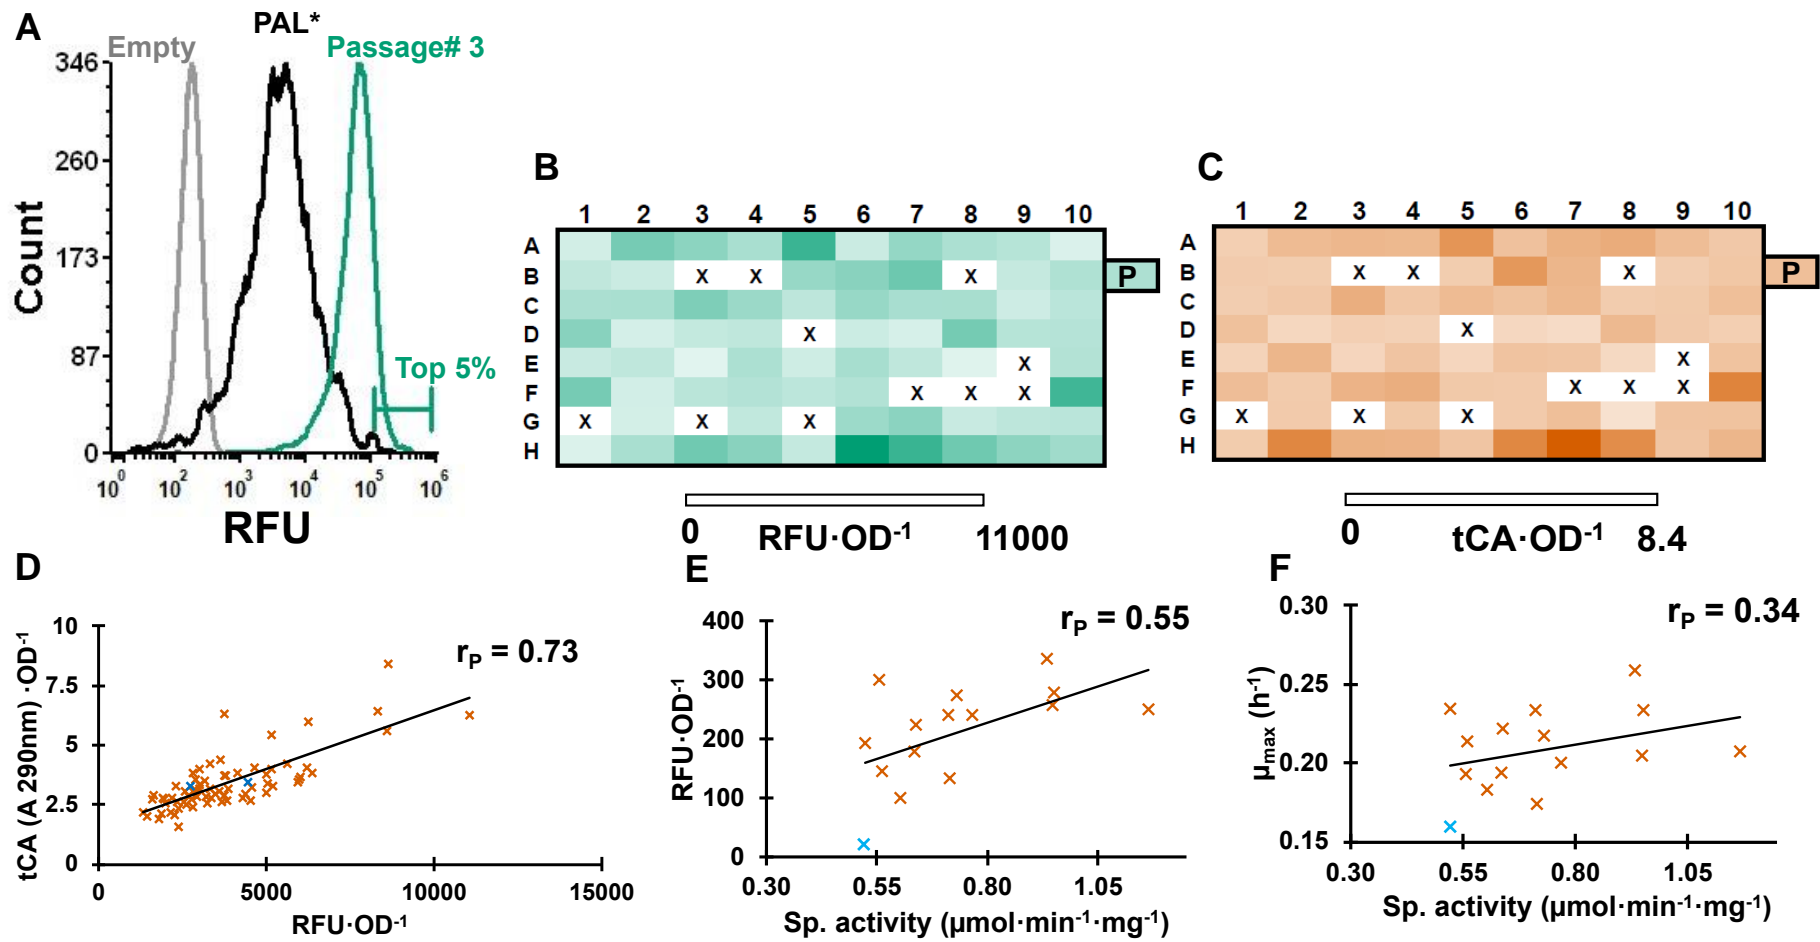

241

242

243

244

245

246

**Figure 4. Screening of growth enriched PAL library.** **A)** Flow cytometry profile of pre-screened library pool transformed into the biosensor strain. **B)** Biosensor output (RFU·OD<sup>-1</sup>) and **C)** whole cell PAL activity (tCA·OD<sup>-1</sup>) of the top 80 variants collected after FACS of pre-screened pool. P = parental enzyme. x = variants that did not revive. Correlation of the top 14 variants between **D)** cellular tCA production and RFU·OD<sup>-1</sup>, **E)** RFU·OD<sup>-1</sup> and specific activity of purified variants, and **F)** growth rate in minimal ammonium-depleted Phe-supplemented pre-screen medium and specific activity of purified variants. Mutants are in brown whereas wildtype is blue.

247 naïve library, indicating the presence of more active PAL variants. We collected  $\sim 10^5$  cells  
248 from the top 2 % of the population from both the library pools and screened  $\sim 96$  variants from  
249 each for fluorescence (using a spectrophotometer) and tCA production (**Figure 5B**). Variants  
250 from both sorts, naïve and pre-screened, showed good correlation between fluorescence and  
251 tCA production. Some variants from the naïve library sort showed low activity indicating  
252 continued presence of cheaters. Conversely, all the variants from pre-screened and sorted pool  
253 displayed similar or higher activity compared to the parental enzyme. Further, no variants from  
254 this pre-screened library were inactive – again, emphasizing the benefit of employing a  
255 screening methodology that minimizes cheater enrichment.

256

257 We sequenced the top 11 variants, performed the Michaelis-Menten kinetic characterization  
258 using purified enzymes, and determined their whole cell tCA conversion (**Figure 6A–B**). Of  
259 the sequenced 11 variants, S98Y-T102K-L566G was represented thrice. We did not detect any  
260 M222L or G218S variants, which were also well-represented in the hits from the first library  
261 (**Table S2**) and also identified previously<sup>37</sup>. Thus, in all, we identified 8 unique variants  
262 characterized them to determine their kinetic constants (**Figure 6A, Table 1**). All the variants  
263 displayed typical Michaelis-Menten behavior with S98Y-T102K-L566G showing the highest  
264 increase in  $k_{cat}$  ( $\sim 1.7$ -fold). Except for two variants, S98T-T102A and S98L-T102A-L566A,  
265 the rest showed improved  $k_{cat}$  compared to the parental enzyme. Correspondingly, we observed  
266 the variants with improved activity to exhibit higher whole cell tCA production (**Figure 6B**).  
267 Notably, most of the variants identified in the current screen had mutations at S98, T102, and  
268 L566. Of these, only T012 has previously been shown to enhance PAL activity<sup>43</sup>. Further, these  
269 positions showed permissivity to biochemically diverse amino acids. For instance, we observed  
270 Tyr, Val, Leu, Thr, and Arg at S98, Ala, Ser, and Lys at T102, and Ala, Gly, Ser, Thr, and Glu  
271 at L566. We mapped the sampled positions onto the PAL structure (PDB: 3CZO) to gain  
272 insights into their functional significance (**Figure S5**). We found that S98 and T102 surround  
273 the active site pocket of PAL, whereas L566 is present in the region that is not well defined in  
274 the crystal structure. Though residues S98 and T102 have not been shown to be catalytically  
275 important, it would be interesting to understand their functional significance in future studies.

276

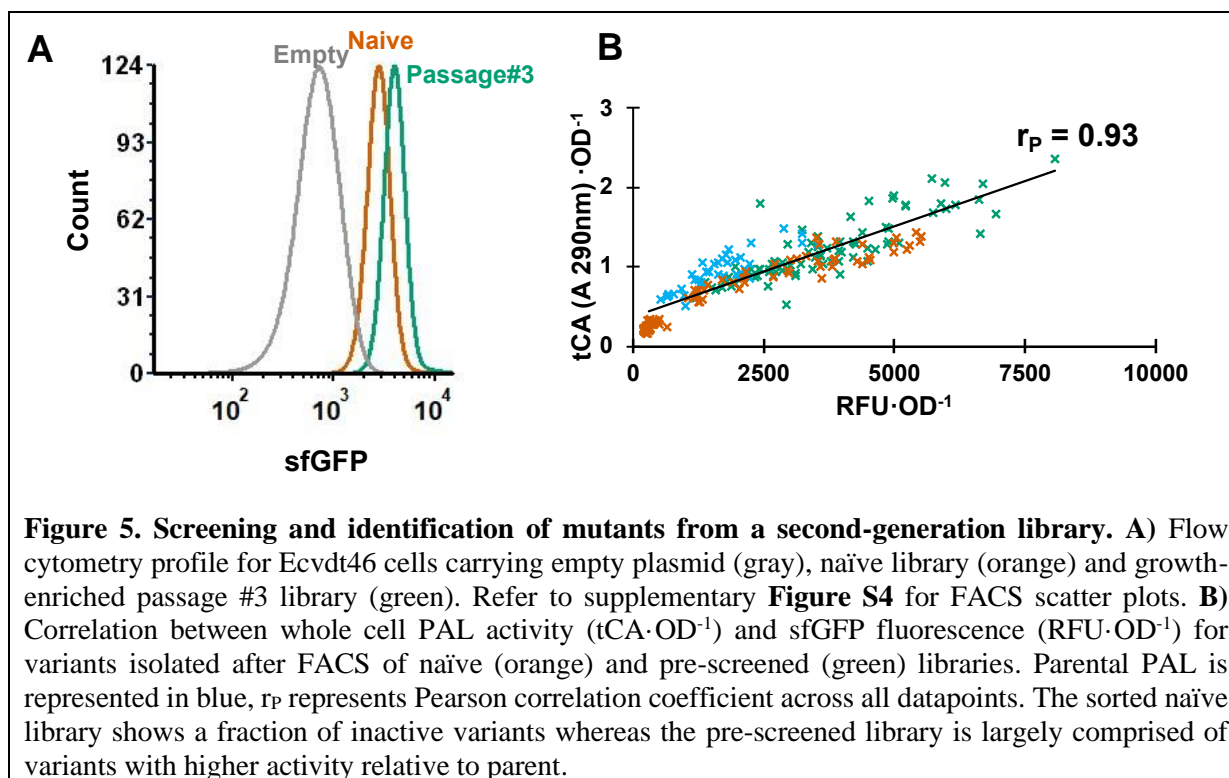

277

278 **Figure 5. Screening and identification of mutants from a second-generation library.** A) Flow  
 279 cytometry profile for Ecvdt46 cells carrying empty plasmid (gray), naïve library (orange) and growth-  
 280 enriched passage #3 library (green). Refer to supplementary **Figure S4** for FACS scatter plots. B)  
 281 Correlation between whole cell PAL activity ( $tCA \cdot OD^{-1}$ ) and sfGFP fluorescence ( $RFU \cdot OD^{-1}$ ) for  
 282 variants isolated after FACS of naïve (orange) and pre-screened (green) libraries. Parental PAL is  
 283 represented in blue,  $r_p$  represents Pearson correlation coefficient across all datapoints. The sorted naïve  
 284 library shows a fraction of inactive variants whereas the pre-screened library is largely comprised of  
 285 variants with higher activity relative to parent.

286

287 **Table 1. Kinetic constants for PAL variants.**

| Variant             | $v_{max}$<br>( $\mu\text{mole} \cdot \text{min}^{-1} \cdot \text{mg}^{-1}$ ) | $K_M$<br>( $\mu\text{M}$ ) | $k_{cat}$<br>( $s^{-1}$ ) | $k_{cat}/K_M$<br>( $s^{-1} \cdot M^{-1}$ ) | Fold increase<br>$k_{cat}$ |
|---------------------|------------------------------------------------------------------------------|----------------------------|---------------------------|--------------------------------------------|----------------------------|
| PAL (parental)      | $0.86 \pm 0.02$                                                              | $160 \pm 17$               | 0.90                      | 5.6                                        | 1.00                       |
| S98Y-T102K-L566G    | $1.45 \pm 0.02$                                                              | $168 \pm 14$               | 1.51                      | 9.0                                        | 1.68                       |
| Q8H-N36I-S98T-T102A | $1.28 \pm 0.01$                                                              | $141 \pm 08$               | 1.33                      | 9.4                                        | 1.48                       |
| S98V-T102K-L566E    | $1.41 \pm 0.02$                                                              | $205 \pm 16$               | 1.46                      | 7.2                                        | 1.63                       |
| S98T-T102S-L566S    | $1.44 \pm 0.03$                                                              | $131 \pm 13$               | 1.50                      | 11.4                                       | 1.67                       |
| S98L-T102S-L566T    | $1.23 \pm 0.02$                                                              | $112 \pm 10$               | 1.28                      | 11.4                                       | 1.42                       |
| S98R-T102A-L566E    | $1.15 \pm 0.02$                                                              | $108 \pm 09$               | 1.20                      | 11.1                                       | 1.33                       |
| S98T-T102A          | $0.89 \pm 0.02$                                                              | $131 \pm 12$               | 0.93                      | 7.1                                        | 1.04                       |
| S98L-T102A-L566A    | $0.91 \pm 0.02$                                                              | $131 \pm 16$               | 0.95                      | 7.2                                        | 1.06                       |

288

289

## 290 CONCLUSIONS.

291 Our work outlines a methodology to successfully overcome enrichment of false positives  
 292 during strain/protein engineering campaigns that utilize biosensors to screen combinatorial  
 293 libraries. We used the tCA biosensor based on the *E. coli hca* operon (including the tCA-  
 294 binding HcaR TF, its native promoter, as well as its target promoter,  $P_{hcaE}$ ) and the PAL enzyme

295

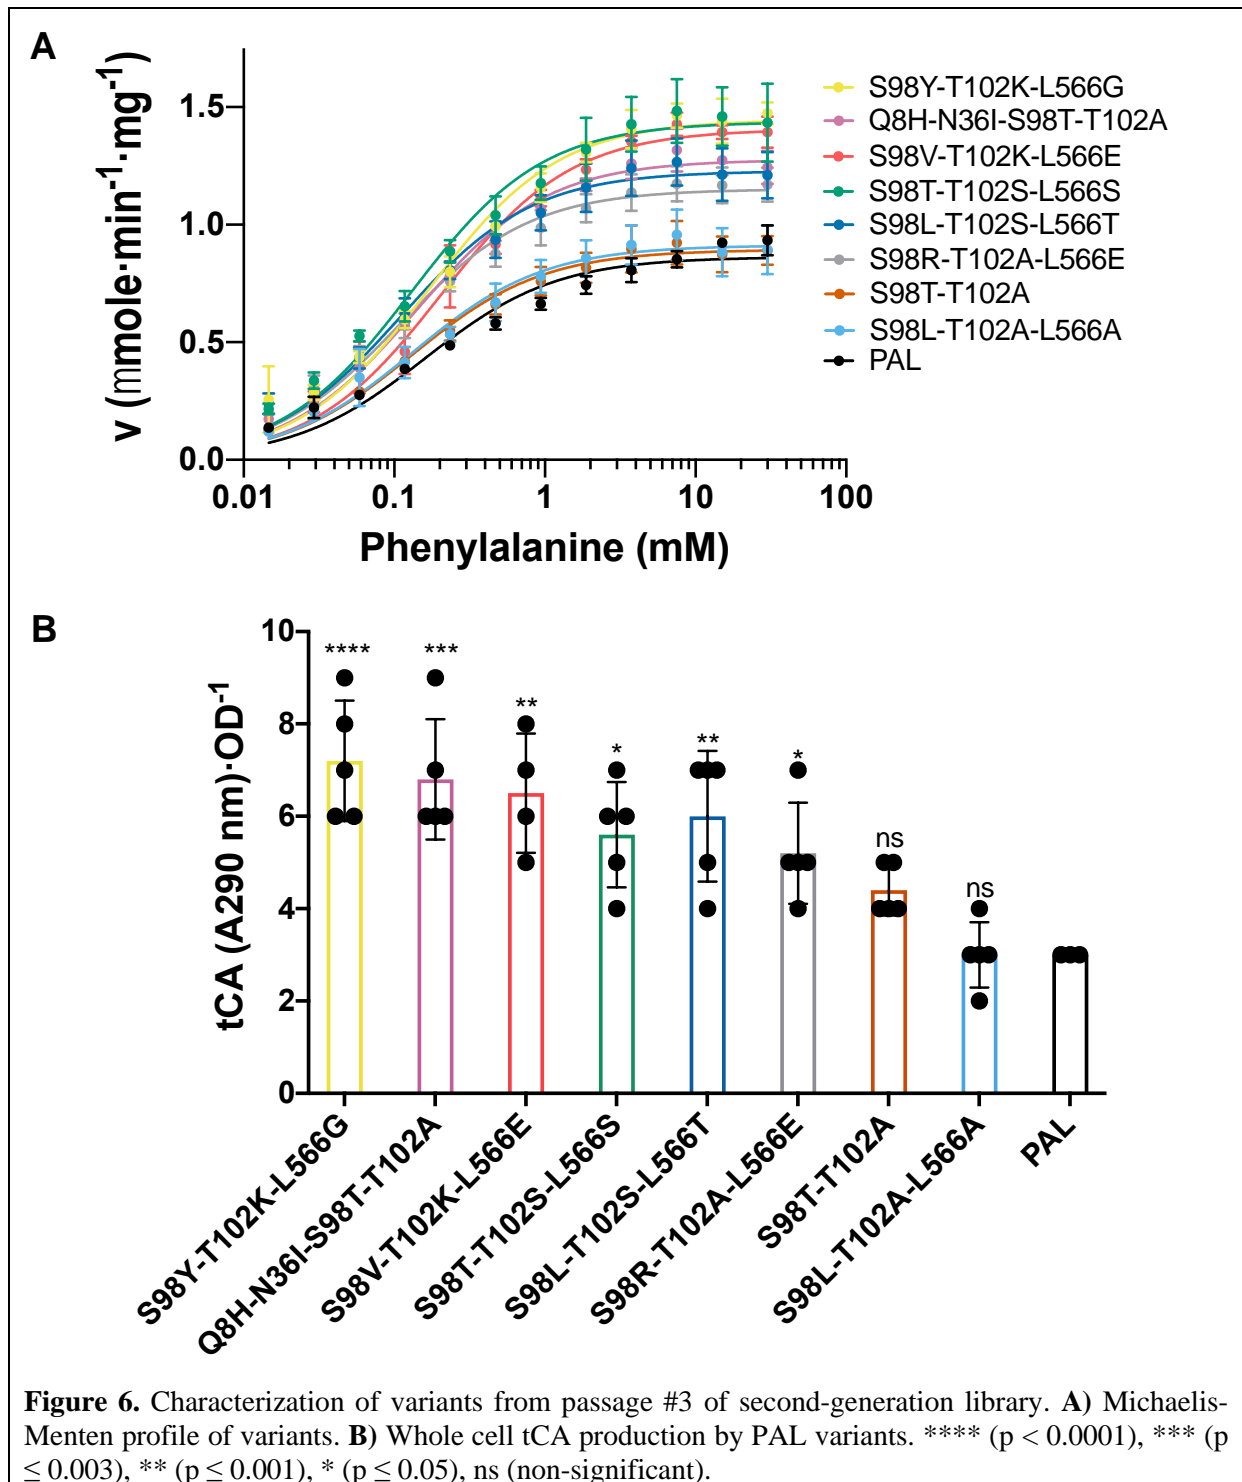

296

297

298

299

300

301

302 as a model system. We demonstrate that false positives (or cheaters) enrich due to cross-feeding  
 303 of tCA – the PAL reaction product and biosensor activator. We hypothesized that since these  
 304 cheaters likely have lower intracellular tCA concentration, decreasing the sensitivity of the  
 305 biosensor could, at least partially, mitigate cheater enrichment. We leverage the intrinsic CCR  
 306 on the *hca* operon by glucose to increase the LOD of the system (decreasing its sensitivity) and

307 demonstrate that this suppresses the relative enrichment of cheaters. While this would also  
308 inhibit the catabolism of tCA by *E. coli*, which could have been beneficial in mitigating cross-  
309 feeding, we believe that the benefits of desensitizing the biosensor likely outweigh any  
310 potential benefit of tCA metabolism. Next, we incorporate our previously developed growth-  
311 based enrichment to further repress cheater enrichment by promoting growth of cells carrying  
312 active PAL. While the growth-based pre-screen was effective at eliminating inactive PAL  
313 variants from the pool, it was only modestly able to link cell growth to tCA productivity.  
314 Conversely, we found that the desensitized biosensor itself was better at quantitatively linking  
315 PAL activity to the reporter output. Thus, a combination of the two screens was able to  
316 optimally identify high activity variants from large, mutagenized libraries. Although the  
317 variants isolated here were not as active as those identified via a more thorough deep mutational  
318 scanning guided engineering approach<sup>43</sup>, the outcomes are more successful than the previously  
319 described approach to engineering PAL activity using the same biosensor<sup>32</sup>. Further, this work  
320 required only a single round of FACS sorting at each step, compared to the previously  
321 approach, where five rounds were needed. We expect that a similar analysis and approach could  
322 be broadly beneficial to other biosensor-guided engineering workflows that suffer from ligand  
323 cross-feeding.

324

## 325 **MATERIALS AND METHODS.**

### 326 **General molecular biology and microbiological techniques.**

327 Error-prone PCR on *Anabaena variabilis* PAL was performed as described previously<sup>37</sup>. PCR  
328 was performed using Phusion DNA polymerase or Platinum™ SuperFi II Green PCR Master  
329 Mix (ThermoFisher Scientific). *E. coli* NEB5 $\alpha$  (New England Biolabs) was used for plasmid  
330 propagation and *E. coli* MG1655 *rph*<sup>+</sup> was used for screening of libraries and purification of  
331 recombinant PAL and its mutants. Sequences of constructed plasmids were confirmed through  
332 DNA sequencing (Genewiz). PAL was expressed under constitutive T5 promoter from plasmid  
333 pBAV1k carrying chloramphenicol resistance. BFP-tagged PAL<sup>-</sup> strain was constructed by  
334 knocking-in BFP under IPTG-inducible T7 promoter at *araC* locus using lambda-red  
335 recombineering. During the flow cytometry experiments, BFP was induced by adding IPTG  
336 (500  $\mu$ M).

337

### 338 **Enzyme assay, purification, and kinetic characterization.**

339 PAL activity was monitored by measuring the production of tCA at 290 nm over time. Briefly,  
340 200  $\mu$ L reaction as performed by 1  $\mu$ g of purified enzyme to pre-warmed (37 °C) 1  $\times$  PBS  
341 containing 30 mM Phe. The assay was performed in 96-well F-bottom UVStar (Greiner Bio-  
342 One, Kremsmünster, Austria) microtiter plate and absorbance at 290 nm was measured every  
343 15 s at 37 °C using a SpectraMax M3 (Molecular Devices) plate reader.

344

345 The enzyme was purified from 25 mL culture. The pellet was washed once with 1  $\times$  PBS and  
346 resuspended in 500  $\mu$ L of the same. This cell suspension was sonicated on ice using a Sonifier  
347 SFX 150 (Branson Ultrasonics, Danbury, CT) (10 s ON; 1 min OFF; 2 min; 40 %), and cell  
348 debris was separated from the lysate by centrifuging at 20,000  $\times$  g for 10 min at 4 °C. As each  
349 construct included a N-term His-tag, the enzyme was purified via immobilized metal affinity  
350 chromatography (IMAC) purification. Briefly, the lysate was loaded onto HisPur™ Ni-NTA  
351 Spin Plates (ThermoFisher Scientific) and incubated for 2 min. After being washed five times  
352 with equilibration buffer, pure protein was then eluted using 200  $\mu$ L of Elution buffer (300 mM  
353 NaCl, 50 mM NaH<sub>2</sub>PO<sub>4</sub>, 500 mM imidazole, pH 8.0). Elution fractions were then dialyzed  
354 using Tube-O-Dialyser tubes (1 kDa MWCO, Geno-Tech). Protein concentration was  
355 estimated by Bradford reagent (VWR) using bovine serum albumin (BSA) as the standard. For  
356 kinetic analysis, PALs were purified and assayed as described above. The activity was  
357 measured at twelve concentrations of Phe ranging from 15  $\mu$ M to 30 mM in PBS at 37 °C. A  
358 Michaelis-Menten curve was fit in GraphPad Prism software using the initial rate at each Phe  
359 concentration.

360

### 361 **Flow cytometry.**

362 Flow cytometry analysis was performed using Attune NxT flow cytometer. Relevant flow  
363 cytometer settings: 12.5  $\mu$ L/min flow rate, 20,000 events collected per sample, FSC:120,  
364 SSC:240, BL1: 300V, VL1: 250 V. The FCS files were analyzed using FSC software v6.

365

### 366 **Microscopy.**

367 Microscopy was performed using DMi8 automated inverted microscope (Leica Microsystems,  
368 #11889113) equipped with a CCD camera (Leica Microsystems, #DFC300 G), and a LED405  
369 (Ex 375–435 nm, Em 450–490 nm, exposure time – 10 ms, gain 2) and YFP (Ex 490–510 nm,  
370 Em 520–550 nm, exposure time – 5ms, gain 1) filter cube. 1  $\mu$ L of cultures were spotted on  
371 agarose pads (2 % w/v, 1 mm thick).

372

373 **Fluorescence-activated cell sorting (FACS).**

374 Cell sorting was performed on a Bio-Rad S3e Cell Sorter. Sorting gates were drawn on dot  
375 plots with FL1 and FL4 on the axes. Sorting was performed on the events in the FL1 green  
376 emission channel. After sorting, some of the cells were plated on LB + Cm (25  $\mu\text{g}\cdot\text{ml}^{-1}$ ) +  
377 Amp (100  $\mu\text{g}\cdot\text{ml}^{-1}$ ) agar plates and remainder was recovered in LB + Cm + Amp liquid medium  
378 and frozen at  $-80\text{ }^{\circ}\text{C}$  for long-term storage.

379

380 **ACKNOWLEDGMENTS.**

381 We would like to thank all the Nair lab members for helpful comments and insights, and  
382 especially Rebecca Condruti for providing inspiration for the title and feedback on the draft.  
383 We also like to thank Pramod K. Jangir for providing feedback on the manuscript.

384

385 **FUNDING.**

386 This work was supported by NIH grants #1DP2HD091798 and #1R03HD090444 as well as  
387 Tufts University's Launcher Accelerator program to N.U.N.

388

389 **CONFLICT OF INTEREST.**

390 V.D.T., T.C.C., and N.U.N. are co-founders of Enrich Bio, LLC.

391

392 **REFERENCES CITED.**

- 393 1. Rogers, J. K.; Church, G. M., Genetically encoded sensors enable real-time observation of  
394 metabolite production. *Proceedings of the National Academy of Sciences* **2016**, *113* (9),  
395 2388-2393.
- 396 2. Raman, S.; Rogers, J. K.; Taylor, N. D.; Church, G. M., Evolution-guided optimization of  
397 biosynthetic pathways. *Proceedings of the National Academy of Sciences* **2014**, *111* (50),  
398 17803-17808.
- 399 3. Dietrich, J. A.; McKee, A. E.; Keasling, J. D., High-throughput metabolic engineering:  
400 advances in small-molecule screening and selection. *Annual review of biochemistry* **2010**,  
401 79, 563-590.
- 402 4. Zhang, J.; Jensen, M. K.; Keasling, J. D., Development of biosensors and their application  
403 in metabolic engineering. *Current opinion in chemical biology* **2015**, *28*, 1-8.



- 404 5. Zhang, J.; Barajas, J. F.; Burdu, M.; Ruegg, T. L.; Dias, B.; Keasling, J. D., Development  
405 of a transcription factor-based lactam biosensor. *ACS synthetic biology* **2017**, *6* (3), 439-  
406 445.
- 407 6. Ho, J. C.; Pawar, S. V.; Hallam, S. J.; Yadav, V. G., An improved whole-cell biosensor  
408 for the discovery of lignin-transforming enzymes in functional metagenomic screens. *ACS*  
409 *synthetic biology* **2018**, *7* (2), 392-398.
- 410 7. de los Santos, E. L.; Meyerowitz, J. T.; Mayo, S. L.; Murray, R. M., Engineering  
411 transcriptional regulator effector specificity using computational design and in vitro rapid  
412 prototyping: developing a vanillin sensor. *ACS synthetic biology* **2016**, *5* (4), 287-295.
- 413 8. Lim, H. G.; Jang, S.; Jang, S.; Seo, S. W.; Jung, G. Y., Design and optimization of  
414 genetically encoded biosensors for high-throughput screening of chemicals. *Current*  
415 *opinion in biotechnology* **2018**, *54*, 18-25.
- 416 9. Wu, Y.; Du, G.; Chen, J.; Liu, L., Genetically encoded biosensors and their applications  
417 in the development of microbial cell factories. In *Engineering of Microbial Biosynthetic*  
418 *Pathways*, Springer: 2020; pp 53-73.
- 419 10. Sherwood, A. V.; Henkin, T. M., Riboswitch-mediated gene regulation: novel RNA  
420 architectures dictate gene expression responses. *Annual review of microbiology* **2016**, *70*,  
421 361-374.
- 422 11. Jang, S.; Jang, S.; Xiu, Y.; Kang, T. J.; Lee, S.-H.; Koffas, M. A.; Jung, G. Y.,  
423 Development of artificial riboswitches for monitoring of naringenin in vivo. *ACS synthetic*  
424 *biology* **2017**, *6* (11), 2077-2085.
- 425 12. Xiu, Y.; Jang, S.; Jones, J. A.; Zill, N. A.; Linhardt, R. J.; Yuan, Q.; Jung, G. Y.; Koffas,  
426 M. A., Naringenin-responsive riboswitch-based fluorescent biosensor module for  
427 *Escherichia coli* co-cultures. *Biotechnology and Bioengineering* **2017**, *114* (10), 2235-  
428 2244.
- 429 13. Patel, P., (Bio) sensors for measurement of analytes implicated in food safety: a review.  
430 *TrAC Trends in Analytical Chemistry* **2002**, *21* (2), 96-115.
- 431 14. Ivnitski, D.; Abdel-Hamid, I.; Atanasov, P.; Wilkins, E.; Stricker, S., Application of  
432 electrochemical biosensors for detection of food pathogenic bacteria. *Electroanalysis: An*  
433 *International Journal Devoted to Fundamental and Practical Aspects of Electroanalysis*  
434 **2000**, *12* (5), 317-325.
- 435 15. Trojanowicz, M., Determination of pesticides using electrochemical enzymatic biosensors.  
436 *Electroanalysis* **2002**, *14* (19-20), 1311-1328.
- 437 16. Pu, J.; Zinkus-Boltz, J.; Dickinson, B. C., Evolution of a split RNA polymerase as a  
438 versatile biosensor platform. *Nature chemical biology* **2017**, *13* (4), 432-438.
- 439 17. Meyer, A. J.; Segall-Shapiro, T. H.; Glassey, E.; Zhang, J.; Voigt, C. A., *Escherichia coli*  
440 "Marionette" strains with 12 highly optimized small-molecule sensors. *Nature chemical*  
441 *biology* **2019**, *15* (2), 196-204.
- 442 18. David, F.; Nielsen, J.; Siewers, V., Flux control at the malonyl-CoA node through  
443 hierarchical dynamic pathway regulation in *Saccharomyces cerevisiae*. *ACS synthetic*  
444 *biology* **2016**, *5* (3), 224-233.
- 445 19. Li, S.; Si, T.; Wang, M.; Zhao, H., Development of a synthetic malonyl-CoA sensor in  
446 *Saccharomyces cerevisiae* for intracellular metabolite monitoring and genetic screening.  
447 *ACS synthetic biology* **2015**, *4* (12), 1308-1315.
- 448 20. De Paepe, B.; Maertens, J.; Vanholme, B.; De Mey, M., Modularization and response  
449 curve engineering of a naringenin-responsive transcriptional biosensor. *ACS synthetic*  
450 *biology* **2018**, *7* (5), 1303-1314.
- 451 21. Zhou, S.; Yuan, S.-F.; Nair, P. H.; Alper, H. S.; Deng, Y.; Zhou, J., Development of a  
452 growth coupled and multi-layered dynamic regulation network balancing malonyl-CoA

- 453 node to enhance (2S)-naringenin biosynthesis in *Escherichia coli*. *Metabolic Engineering*  
454 **2021**.
- 455 22. Wang, G.; Özmerih, S. I.; Guerreiro, R.; Meireles, A. C.; Carolas, A.; Milne, N.; Jensen,  
456 M. K.; Ferreira, B. S.; Borodina, I., Improvement of cis, cis-muconic acid production in  
457 *Saccharomyces cerevisiae* through biosensor-aided genome engineering. *ACS synthetic*  
458 *biology* **2020**, *9* (3), 634-646.
- 459 23. Jensen, E. D.; Ambri, F.; Bendtsen, M. B.; Javanpour, A. A.; Liu, C. C.; Jensen, M. K.;  
460 Keasling, J. D., Integrating continuous hypermutation with high-throughput screening for  
461 optimization of cis, cis-muconic acid production in yeast. *Microbial Biotechnology* **2021**.
- 462 24. Zheng, S.; Hou, J.; Zhou, Y.; Fang, H.; Wang, T.-T.; Liu, F.; Wang, F.-S.; Sheng, J.-  
463 Z., One-pot two-strain system based on glucaric acid biosensor for rapid screening of myo-  
464 inositol oxygenase mutations and glucaric acid production in recombinant cells. *Metabolic*  
465 *engineering* **2018**, *49*, 212-219.
- 466 25. Dabirian, Y.; Gonçalves Teixeira, P.; Nielsen, J.; Siewers, V.; David, F., FadR-based  
467 biosensor-assisted screening for genes enhancing fatty Acyl-CoA pools in *Saccharomyces*  
468 *cerevisiae*. *ACS synthetic biology* **2019**, *8* (8), 1788-1800.
- 469 26. Kunjapur, A. M.; Prather, K. L., Development of a vanillate biosensor for the vanillin  
470 biosynthesis pathway in *E. coli*. *ACS synthetic biology* **2019**, *8* (9), 1958-1967.
- 471 27. Jha, R. K.; Bingen, J. M.; Johnson, C. W.; Kern, T. L.; Khanna, P.; Trettel, D. S.;  
472 Strauss, C. E.; Beckham, G. T.; Dale, T., A protocatechuate biosensor for *Pseudomonas*  
473 *putida* KT2440 via promoter and protein evolution. *Metabolic engineering communications*  
474 **2018**, *6*, 33-38.
- 475 28. Yu, H.; Chen, Z.; Wang, N.; Yu, S.; Yan, Y.; Huo, Y.-X., Engineering transcription  
476 factor BmoR for screening butanol overproducers. *Metabolic engineering* **2019**, *56*, 28-38.
- 477 29. Roth, T. B.; Woolston, B. M.; Stephanopoulos, G.; Liu, D. R., Phage-assisted evolution  
478 of *Bacillus methanolicus* methanol dehydrogenase 2. *ACS synthetic biology* **2019**, *8* (4),  
479 796-806.
- 480 30. Popa, S. C.; Inamoto, I.; Thuronyi, B. W.; Shin, J. A., Phage-Assisted Continuous  
481 Evolution (PACE): A Guide Focused on Evolving Protein–DNA Interactions. *ACS omega*  
482 **2020**, *5* (42), 26957-26966.
- 483 31. Inamoto, I.; Sheoran, I.; Popa, S. C.; Hussain, M.; Shin, J. A., Combining Rational Design  
484 and Continuous Evolution on Minimalist Proteins That Target the E-box DNA Site. *ACS*  
485 *Chemical Biology* **2020**, *16* (1), 35-44.
- 486 32. Flachbart, L. K.; Sokolowsky, S.; Marienhagen, J., Displaced by deceivers: prevention of  
487 biosensor cross-talk is pivotal for successful biosensor-based high-throughput screening  
488 campaigns. *ACS synthetic biology* **2019**, *8* (8), 1847-1857.
- 489 33. van Sint Fiet, S.; van Beilen, J. B.; Witholt, B., Selection of biocatalysts for chemical  
490 synthesis. *Proceedings of the National Academy of Sciences* **2006**, *103* (6), 1693-1698.
- 491 34. Dietrich, J. A.; Shis, D. L.; Alikhani, A.; Keasling, J. D., Transcription factor-based  
492 screens and synthetic selections for microbial small-molecule biosynthesis. *ACS synthetic*  
493 *biology* **2013**, *2* (1), 47-58.
- 494 35. Woolston, B. M.; Roth, T.; Kohale, I.; Liu, D. R.; Stephanopoulos, G., Development of  
495 a formaldehyde biosensor with application to synthetic methylotrophy. *Biotechnology and*  
496 *bioengineering* **2018**, *115* (1), 206-215.
- 497 36. Le, T.-K.; Ju, S.-B.; Lee, H.-W.; Lee, J.-Y.; Oh, S.-H.; Kwon, K.-K.; Sung, B.-H.; Lee,  
498 S.-G.; Yeom, S.-J., Biosensor-Based Directed Evolution of Methanol Dehydrogenase from  
499 *Lysinibacillus xylanilyticus*. *International Journal of Molecular Sciences* **2021**, *22* (3),  
500 1471.

- 501 37. Mays, Z. J.; Mohan, K.; Trivedi, V. D.; Chappell, T. C.; Nair, N. U., Directed evolution  
502 of *Anabaena variabilis* phenylalanine ammonia-lyase (PAL) identifies mutants with  
503 enhanced activities. *Chemical Communications* **2020**, *56* (39), 5255-5258.
- 504 38. Díaz, E.; Ferrández, A.; García, J. L., Characterization of the hca cluster encoding the  
505 dioxygenolytic pathway for initial catabolism of 3-phenylpropionic acid in *Escherichia coli*  
506 K-12. *Journal of bacteriology* **1998**, *180* (11), 2915-2923.
- 507 39. Wang, B.; Barahona, M.; Buck, M., Amplification of small molecule-inducible gene  
508 expression via tuning of intracellular receptor densities. *Nucleic acids research* **2015**, *43*  
509 (3), 1955-1964.
- 510 40. Blazeck, J.; Alper, H. S., Promoter engineering: recent advances in controlling transcription  
511 at the most fundamental level. *Biotechnology journal* **2013**, *8* (1), 46-58.
- 512 41. Hammer, K.; Mijakovic, I.; Jensen, P. R., Synthetic promoter libraries—tuning of gene  
513 expression. *Trends in biotechnology* **2006**, *24* (2), 53-55.
- 514 42. Turlin, E.; Perrotte-piquemal, M.; Danchin, A.; Biville, F., Regulation of the early steps  
515 of 3-phenylpropionate catabolism in *Escherichia coli*. *Journal of molecular microbiology*  
516 *and biotechnology* **2001**, *3* (1), 127-133.
- 517 43. Trivedi, V. D.; Chappell, T. C.; Krishna, N. B.; Shetty, A.; Sigamani, G. G.; Mohan, K.;  
518 Ramesh, A.; Kumar, P.; Nair, N. U., In-depth sequence-function characterization reveals  
519 multiple paths to enhance phenylalanine ammonia-lyase (PAL) activity. *bioRxiv* **2021**.
- 520
